# Supplementary material for: Self-testing for pregnancy: a systematic review and meta-analysis
Source: HighWire-hosted journal article supplement (doi:10.1136/bmjopen-2021-054120), 2022-02-01
Supplement: bmjopen-2021-054120supp001_data_supplement.pdf [file bmjopen-2021-054120supp001_data_supplement.pdf]

## **Self-testing for pregnancy: a systematic review and meta-analysis**

### **Appendix A. Search Strategy**

Search date: 02 Nov 2020

#### **Pubmed**

("pregnancy tests" [Mesh] OR "Pregnancy Tests, Immunologic" [Mesh] OR "pregnancy test" [tiab] OR "pregnancy diagnosis" [tiab])

AND

("self care"[Mesh] OR "self-care"[tiab] OR "self-test"[tiab] OR "self-evaluation"[tiab] OR "self-evaluate"[tiab] OR "self-management"[tiab] OR "self-monitor"[tiab] OR "self-manage"[tiab] OR "self-monitored"[tiab] OR "self-managed"[tiab] OR "home"[tiab])

#### **CINAHL**

AB: "pregnancy test" OR "pregnancy diagnosis"

AND

AB: "self care" OR "self-test" OR "self-evaluation" OR "self-evaluate" OR "self-management" OR "self-manage" OR "self-monitor" OR "self-monitored" OR "home"

#### **LILACS**

"pregnancy test" OR "pregnancy diagnosis"

AND

"self care" OR "self-test" OR "self-evaluation" OR "self-evaluate" OR "self-management" OR "self-manage" OR "self-monitor" OR "self-monitored" OR "home"

#### **EMBASE**

('pregnancy test':ti,ab,kw OR 'pregnancy diagnosis':ti,ab,kw) AND ('self care':ti,ab,kw OR 'self-test':ti,ab,kw OR 'self-evaluation':ti,ab,kw OR 'self-evaluate':ti,ab,kw OR 'self-management':ti,ab,kw OR 'self-manage':ti,ab,kw OR 'self-monitor':ti,ab,kw OR 'self-monitored':ti,ab,kw OR 'home':ti,ab,kw)

#### **clinicaltrials.gov**

"pregnancy test" OR "pregnancy diagnosis"

#### **WHO ICTRP**

"pregnancy test" OR "pregnancy diagnosis"

#### **PACTR**

"pregnancy test" OR "pregnancy diagnosis"

#### **Australian New Zealand Clinical Trials Registry**

"pregnancy test" OR "pregnancy diagnosis"
